# Supplementary material for: Mental health research in Botswana: a semi-systematic scoping review
Source: PubMed Central journal article supplement — J Int Med Res. 2020 Oct 28;48(10):0300060520966458. doi: 10.1177/0300060520966458 (PMC7607297; doi:10.1177/0300060520966458), 2020-10-28
Supplement: sj-pdf-1-imr-10.1177_0300060520966458.pdf [file sj-pdf-1-imr-10.1177_0300060520966458.pdf]

| Authors                | Date of publication        | Author affiliations (first author)                 | Location                         | Title                                                                                           | Method Characteristics                                                                                                                                                                                                                                                                                                                                                                       | Key Findings                                                                                                                                                                                                                                                                                                                                              |
|------------------------|----------------------------|----------------------------------------------------|----------------------------------|-------------------------------------------------------------------------------------------------|----------------------------------------------------------------------------------------------------------------------------------------------------------------------------------------------------------------------------------------------------------------------------------------------------------------------------------------------------------------------------------------------|-----------------------------------------------------------------------------------------------------------------------------------------------------------------------------------------------------------------------------------------------------------------------------------------------------------------------------------------------------------|
| Ben-Tovim <sup>1</sup> | 1981<br>(January-March)    | Repatriation General Hospital, Adelaide, Australia | Botswana's State Mental Hospital | A comparison between patients admitted to psychiatric hospitals in Botswana and South Australia | Design: cross-sectional<br><br>A clinical interview using ICD-9 criteria.<br><br>Sample size: 100<br><br>Statistical analysis: descriptive statistics                                                                                                                                                                                                                                        | Psychotic were mostly diagnosed in Botswana compared to Australia with mostly neurotic disorders.<br><br>Patients in Botswana presented earlier compared to those in Australia.<br><br>Patient in Botswana had aggression directed towards properties and others, while in Australia, patients' aggression was mostly directed toward self.               |
| Ben-Tovim <sup>2</sup> | 1981 (June) to 1982 (June) | University of South Australia                      | Chobe region                     | Prevalence of schizophrenia in a remote area of Botswana                                        | <b>Design:</b> cross-sectional<br><br><b>Measure:</b> A clinical interview using ICD-9 criteria.<br><br><b>Sample size:</b> 26<br><br><b>Sample characteristic:</b> male and females 15 years and above                                                                                                                                                                                      | The adjusted annual prevalence of schizophrenia in Botswana was 5.3 per 1000 using ICD-9 and 4.3 per 1000                                                                                                                                                                                                                                                 |
| John <sup>3</sup>      | 1983                       | Mid-America Nazarene College, USA                  | Botswana towns and villages      | Children's thinking in Botswana: Piaget tasks examined                                          | <b>Design:</b> Cross sectional<br><br><b>Measure:</b> Six tasks were completed. Conservation of number, length, mass and weight, seriation and classification exercises were carried out using materials commonly found in the culture<br><br><b>Sample size:</b> 554<br><br><b>Sample characteristics:</b> primary school children from urban, rural, and traditional village environments. | Urban children completed tasks at an earlier age than those from other environments.<br><br>Number and seriation conservation age in African children is similar to those of Euro-American cultures.<br><br>The tasks of conservation of length, mass and weight, and classification shows a later developmental age than the Euro- American Counterparts |
| Ben-Tovim <sup>4</sup> | 1983                       | Jubilee psychiatric hospital (JPH).                | Ghanzi; kgalagadi, and Chobe     | A psychiatric service to the remote areas of Botswana                                           | <b>Design:</b> Cross-sectional study.<br><br><b>Measure:</b> A clinical interview using ICD-9                                                                                                                                                                                                                                                                                                | Sex ratio F:M =1:3<br><br>Mean age: new patients = 26±13; repeat                                                                                                                                                                                                                                                                                          |

| Authors                | Date of publication | Author affiliations (first author)   | Location                       | Title                                                                                                             | Method Characteristics                                                                                                                                                                                                                                     | Key Findings                                                                                                                                                                                                                                                                                                                                                                 |
|------------------------|---------------------|--------------------------------------|--------------------------------|-------------------------------------------------------------------------------------------------------------------|------------------------------------------------------------------------------------------------------------------------------------------------------------------------------------------------------------------------------------------------------------|------------------------------------------------------------------------------------------------------------------------------------------------------------------------------------------------------------------------------------------------------------------------------------------------------------------------------------------------------------------------------|
|                        |                     |                                      |                                |                                                                                                                   | <p>criteria.</p> <p><b>Sample size:</b> 124 patients</p> <p><b>Sample characteristics:</b> All out-patients seen from January to December 1981, both new and repeat. Mean age 33 years</p>                                                                 | <p>31±15.</p> <p>The most common disorder was Epilepsies, followed by schizophrenias.</p> <p>Clinical services were mostly provided in the context of family and community rather than institutional care</p> <p>Deficiencies in services were majorly shortage of health care professionals; and lack of comprehensive approach to diagnosis and treatment of disorders</p> |
| Ben-Tovim <sup>5</sup> | 1985                | Jubilee Hospital, Francistown        | Jubilee Hospital, Francistown  | DSM-III in Botswana: a field trial in a developing country                                                        | <p><b>Design:</b> cross-sectional</p> <p><b>Measure:</b> DSM-III</p> <p><b>Sample size:</b> 106</p> <p><b>Sample Characteristics:</b> 59 men and 47 women new patients, age unspecified.</p>                                                               | <p>DSM-III criteria were generally applicable to the diagnoses of conditions in the developing countries.</p> <p>The most common diagnosis was adjustment disorder</p>                                                                                                                                                                                                       |
| Delmonico <sup>6</sup> | 2001                | Duquesne University, Pittsburgh, USA | Towns and villages in Botswana | Compulsive Sexual Behavior and HIV in Africa: A First Look                                                        | <p><b>Design:</b> cross sectional</p> <p><b>Measure:</b> Sexual Addiction screening Test (SAST) used and compared with already existing scores of 42 American males</p> <p><b>Sample size:</b> 52</p> <p><b>Sample characteristics:</b> Batswana males</p> | <p>Batswana males had higher mean SAST scores and endorsed specific items on the SAST more frequently than their American counterparts.</p>                                                                                                                                                                                                                                  |
| Phorano <sup>7</sup>   | 2005                | University of Botswana               | Gaborone<br>Maun               | Alcohol abuse, gender-based violence and HIV/AIDS in Botswana: establishing the link based on empirical evidence. | <p><b>Design:</b> Case study</p> <p><b>Measure:</b> In-depth interviews</p> <p><b>Sample size:</b> 20 cases</p> <p><b>Sample characteristics:</b> women selected</p>                                                                                       | <p>There is a relationship between alcohol abuse and gender-based violence, which makes victims vulnerable to HIV infection.</p>                                                                                                                                                                                                                                             |

| Authors             | Date of publication | Author affiliations (first author) | Location                       | Title                                                                                                                              | Method Characteristics                                                                                                                                                                                                                                                                                                                      | Key Findings                                                                                                                                                                                                                                                                                                                                                                                                                         |
|---------------------|---------------------|------------------------------------|--------------------------------|------------------------------------------------------------------------------------------------------------------------------------|---------------------------------------------------------------------------------------------------------------------------------------------------------------------------------------------------------------------------------------------------------------------------------------------------------------------------------------------|--------------------------------------------------------------------------------------------------------------------------------------------------------------------------------------------------------------------------------------------------------------------------------------------------------------------------------------------------------------------------------------------------------------------------------------|
|                     |                     |                                    |                                |                                                                                                                                    | from 5 NGOs                                                                                                                                                                                                                                                                                                                                 |                                                                                                                                                                                                                                                                                                                                                                                                                                      |
| Malete <sup>8</sup> | 2007                | UB                                 | 4 main urban areas in Botswana | Aggressive and Antisocial Behaviours Among Secondary School Students in Botswana: The Influence of Family and School Based Factors | <p><b>Design:</b> Cross sectional</p> <p><b>Measure:</b> Investigator designed questionnaire. Aggression scale (Orpinas and Frankowski 2001).</p> <p><b>Sample size:</b> 1478</p> <p><b>Sample characteristics:</b> male = 48.8% and female = 51.2%.</p> <p>Age ranged between 12- 20 years junior and Senior Secondary school students</p> | <p>The prevalence of self-reported aggressive tendencies and antisocial behaviors were notable</p> <p>Boys rated themselves higher than girls on aggression, use of alcohol and drugs</p> <p>High scores were significantly related to poor parent child relations and low parental monitoring.</p>                                                                                                                                  |
| Decker <sup>9</sup> | 2007                | University of Massachusetts , USA  | Unspecified are in Botswana    | Failed Urban Migration and Psychosomatic Numbing: Cortisol, Unfulfilled Lifestyle Aspirations and Depression in Botswana           | <p><b>Design:</b> ethnographic</p> <p><b>Sample characteristics:</b> rural and urban adult Botswana men.</p>                                                                                                                                                                                                                                | <p>Failed urban migration is associated with low cortisol and high depressive affect, and rural residence is also independently associated with high depressive affect.</p> <p>This psychosomatic syndrome may be like that observed in posttraumatic stress disorder, suggesting that the experience of failed urban migration is considerably more stressful than the demands of employed urban life in contemporary Botswana.</p> |

| Authors                               | Date of publication | Author affiliations (first author)                            | Location                                                                             | Title                                                                                                                                         | Method Characteristics                                                                                                                                                                                                                                             | Key Findings                                                                                                                                                                                                                                                                                                                                                                                                         |
|---------------------------------------|---------------------|---------------------------------------------------------------|--------------------------------------------------------------------------------------|-----------------------------------------------------------------------------------------------------------------------------------------------|--------------------------------------------------------------------------------------------------------------------------------------------------------------------------------------------------------------------------------------------------------------------|----------------------------------------------------------------------------------------------------------------------------------------------------------------------------------------------------------------------------------------------------------------------------------------------------------------------------------------------------------------------------------------------------------------------|
| Thupayagale-Tshweneagae <sup>10</sup> | 2008                | Department of Nursing Education<br><br>University of Botswana | One rural village in Botswana                                                        | Psychosocial effects experienced by grandmothers as primary caregivers in rural Botswana                                                      | <b>Design:</b> Critical ethnographic design<br><br><b>Measure:</b> Semi-structured questions<br><br><b>Sample Size:</b> 25<br><br><b>Sample characteristics:</b> grandmothers who were primary caregivers to their grandchildren in one rural village of Botswana  | A central theme that emerged from the interviews under psychological effects was 'disenfranchised grief' with sub themes that included depression, loneliness, blaming and stress. The themes that emerged on social effects included isolation, loss of control, unavailability of mental health services, financial hardships and a sense of failure for some participants.                                        |
| Segopolo <sup>11</sup>                | 2009                | UB                                                            | Gaborone and surrounding areas in Botswana                                           | A screening instrument for psychological distress in Botswana: validation of the Setswana version of the 28-item general health questionnaire | <b>Design:</b> Cross sectional<br><br><b>Measure:</b> GHQ-28, Clinical Interview Schedule (CIS).<br><br><b>Sample size:</b> 126<br><br><b>Sample characteristics:</b> outpatients                                                                                  | Nil gender difference between the GHQ and CIS scores<br><br>The Setswana GHQ-28 is valid for use in primary health care setting in Botswana                                                                                                                                                                                                                                                                          |
| Seloilwe <sup>12</sup>                | 2009                | UB, school of nursing                                         | Awaiting full text                                                                   | Sexual Abuse and Violence Among Adolescent Girls in Botswana: A Mental Health Perspective                                                     | <b>Design:</b> Case study<br><br><b>Sample characteristics:</b> female adolescents                                                                                                                                                                                 | sexual abuse and violence have profound mental health consequences including guilt, anxiety, depression and anger.                                                                                                                                                                                                                                                                                                   |
| Page <sup>13</sup>                    | 2009                | Brigham Young University                                      | Botswana<br><br>Kenya<br><br>Namibia<br><br>Uganda<br><br>Zambia and<br><br>Zimbabwe | Psychosocial Distress and Alcohol Use as Factors in Adolescent Sexual Behavior Among Sub-Saharan African Adolescents                          | <b>Design:</b> cross-sectional<br><br><b>Measure:</b> The Global School-based Student Health Survey (GSHS)<br><br><b>Sample size:</b> 22,949<br><br><b>Sample Characteristics:</b> Adolescents in 6 countries (Botswana, Kenya, Uganda, Zambia, Namibia, Zimbabwe) | Sexual behaviors (having sex or having sex with 2 or more people) were associated with both psychosocial distress and alcohol use.<br><br>That both boys and girls reporting psychosocial distress and alcohol use were at higher risk for having sex.<br><br>The likelihood of sexual behaviors increased when there was an increase in the number of psychosocial indicators and frequency of alcohol consumption. |

| Authors                               | Date of publication | Author affiliations (first author) | Location                                           | Title                                                                                                               | Method Characteristics                                                                                                                                                                                                                                                                                            | Key Findings                                                                                                                                                                                                                                                                                                                                                                    |
|---------------------------------------|---------------------|------------------------------------|----------------------------------------------------|---------------------------------------------------------------------------------------------------------------------|-------------------------------------------------------------------------------------------------------------------------------------------------------------------------------------------------------------------------------------------------------------------------------------------------------------------|---------------------------------------------------------------------------------------------------------------------------------------------------------------------------------------------------------------------------------------------------------------------------------------------------------------------------------------------------------------------------------|
| Dunn <sup>14</sup>                    | 2009                | University of South Africa         | Botswana                                           | Play Therapy as an Intervention Against Sexual Violence in Botswana                                                 | <p><b>Design:</b> Qualitative research (focus group discussion)</p> <p><b>Sample size:</b>18</p> <p><b>Sample characteristic:</b> social workers and lay counsellors from the Botswana region</p>                                                                                                                 | The study reveals that the Westernized concept of Play Therapy, with adaptation, is relevant within Botswana                                                                                                                                                                                                                                                                    |
| Gupta <sup>15</sup>                   | 2010                | University of California, USA      | 5 districts in Botswana                            | Depression and HIV in Botswana: A Population-Based Study on Gender-Specific Socioeconomic and Behavioral Correlates | <p><b>Design:</b> cross-sectional population-based study</p> <p>Measure: Hopkins Symptom Checklist for Depression (HSCL-D)</p> <p><b>Sample size:</b> 1,268</p> <p><b>Sample characteristics:</b> 18–49-year-old adults from five districts in Botswana with the highest prevalence of HIV-infection.</p>         | <p>25.3% of women and 31.4% of men had depression.</p> <p>Among women, lower education, higher income and lack of control in sexual decision-making positively associated with depression.</p> <p>Among men, being single, living in a rural area, frequent visits to a health provider, anticipated HIV stigma, and intergenerational sex were associated with depression.</p> |
| Lawler <sup>16</sup>                  | 2010                | Upenn, USA.                        | Princess marina Hospital (PMH), Gaborone, Botswana | Neurocognitive impairment among HIV-positive individuals in Botswana: a pilot study.                                | <p><b>Design:</b> cross-sectional study</p> <p><b>Measure:</b> inventory of activities of daily living (ADL), and subjective questionnaire of cognitive functioning.</p> <p><b>Sample size:</b> 120</p> <p><b>Sample characteristics:</b> HIV-positive individuals (60 men and 60 women), age of 21-50 years.</p> | <p>38% met criteria for dementia on the IHDS, and 24% were diagnosed with major depressive disorder.</p> <p>The prevalence of neurocognitive impairment in HIV-positive individuals in Botswana is higher than expected despite the use of HAART. This thus suggest the need for early introduction of HAART.</p>                                                               |
| Thupayagale-Tshweneagae <sup>17</sup> | 2010                | UB                                 | Multi-center, Botswana.                            | Emotional violence among women in intimate relationships in Botswana                                                | <p><b>Design:</b> cross-sectional Qualitative</p> <p><b>Measure:</b> Six months period of extensive (unstructured) interview.</p> <p><b>Sample size:</b> 10</p> <p><b>Sample characteristics:</b> Age: 35-56 years.</p>                                                                                           | <p>Socio-cultural practices are major contributors of abuse in Botswana.</p> <p>Education and employment worsen abuse.</p> <p>Depression and anxiety are common results</p>                                                                                                                                                                                                     |

| Authors                | Date of publication | Author affiliations (first author) | Location               | Title                                                                                      | Method Characteristics                                                                                                                                                                                                                                | Key Findings                                                                                                                                                                                                                                                                                                                                                                                                                                                                                                                                                                                                                                                                                                                                                                                                                                                                                                                                                                                                                                                                                                                                                                                                                                                                                            |
|------------------------|---------------------|------------------------------------|------------------------|--------------------------------------------------------------------------------------------|-------------------------------------------------------------------------------------------------------------------------------------------------------------------------------------------------------------------------------------------------------|---------------------------------------------------------------------------------------------------------------------------------------------------------------------------------------------------------------------------------------------------------------------------------------------------------------------------------------------------------------------------------------------------------------------------------------------------------------------------------------------------------------------------------------------------------------------------------------------------------------------------------------------------------------------------------------------------------------------------------------------------------------------------------------------------------------------------------------------------------------------------------------------------------------------------------------------------------------------------------------------------------------------------------------------------------------------------------------------------------------------------------------------------------------------------------------------------------------------------------------------------------------------------------------------------------|
|                        |                     |                                    |                        |                                                                                            | Educated women in relationship for more than 10 years and were at least 5 years older than their partners.                                                                                                                                            | of abuse                                                                                                                                                                                                                                                                                                                                                                                                                                                                                                                                                                                                                                                                                                                                                                                                                                                                                                                                                                                                                                                                                                                                                                                                                                                                                                |
| Plattner <sup>18</sup> | 2010                | Department of Psychology, UB       | University of Botswana | 'We are the forgotten ones': occupational stress among university secretaries in Botswana. | <p><b>Design:</b> Cross-sectional</p> <p><b>Measure:</b> author designed self-administered questionnaire.</p> <p><b>Sample size:</b> 64</p> <p><b>Sample characteristics:</b> Secretaries listed in the University's internal telephone directory</p> | <p>Overall, respondents were satisfied with their job</p> <ul style="list-style-type: none"> <li>▪ 68.9% liked the kind of work they did</li> <li>▪ 89.1% felt productive at work</li> <li>▪ 89.1% reported having a good relationship with their supervisor.</li> <li>▪ 65.6% felt that they were not paid a fair salary</li> <li>▪ 62.9% were not satisfied with their chances for promotion.</li> <li>▪ only 15.6% of the respondents felt that the amount of work was too much,</li> <li>▪ 54.7% reported that 'sometimes' they had nothing to do. A relatively high number of 67.2% respondents reported that 'sometimes' they felt quite bored at work and 68.3% 'sometimes' wished that they had more work to do.</li> </ul> <p>In some cases the mere exposure to certain potential stressors (i.e. lack of job clarity, supervising junior colleagues, sharing a telephone and sharing a computer) was associated with psychosomatic problems, regardless of whether these stressors were subjectively perceived as stressful or not</p> <p>Respondents who reported that they had junior colleagues who did not want to be supervised by them were more likely to report insomnia and digestive problems. Sharing a telephone as well as sharing a computer was associated with headaches</p> |
| Shumba <sup>19</sup>   | 2011                | Faculty of Humanities ,            | Botswana Not           | The Nature, Extent and Causes of Abuse of                                                  | <b>Design:</b> cross-sectional                                                                                                                                                                                                                        | Most of the participants were involved in doing domestic chores. They were also                                                                                                                                                                                                                                                                                                                                                                                                                                                                                                                                                                                                                                                                                                                                                                                                                                                                                                                                                                                                                                                                                                                                                                                                                         |

| Authors                 | Date of publication | Author affiliations (first author)                                        | Location                                                   | Title                                                                                                                            | Method Characteristics                                                                                                                                                                                                                                                                                                                                                                                                                                                          | Key Findings                                                                                                                                                                                                                                                                                                                                                                                                                                                                                                                        |
|-------------------------|---------------------|---------------------------------------------------------------------------|------------------------------------------------------------|----------------------------------------------------------------------------------------------------------------------------------|---------------------------------------------------------------------------------------------------------------------------------------------------------------------------------------------------------------------------------------------------------------------------------------------------------------------------------------------------------------------------------------------------------------------------------------------------------------------------------|-------------------------------------------------------------------------------------------------------------------------------------------------------------------------------------------------------------------------------------------------------------------------------------------------------------------------------------------------------------------------------------------------------------------------------------------------------------------------------------------------------------------------------------|
|                         |                     | Central University of Technology , Bloemfontein, Free State, South Africa | specified                                                  | Children with Disabilities in Schools in Botswana                                                                                | <p><b>Measure:</b> adapted pupil questionnaire</p> <p><b>Sample size:</b> 31</p> <p><b>Sample characteristics:</b> pupils with disabilities (15 children with vision impairment and 16 children with hearing impairment) selected from special schools in Botswana</p>                                                                                                                                                                                                          | <p>sexually, physically and emotionally abused by their teachers.</p> <p>This study showed that children with disabilities were vulnerable to child abuse in their schools.</p>                                                                                                                                                                                                                                                                                                                                                     |
| Lowenthal <sup>20</sup> | 2011                | Children's Hospital of Philadelphia                                       | Infectious disease clinics Francistown and Maun, Botswana. | Validation of the Pediatric Symptom Checklist in HIV-infected Botswana                                                           | <p><b>Design:</b> Cross-sectional</p> <p><b>Measure:</b> Paediatric Symptom Checklist, Children's Depression Inventory and the Revised Children's Manifest Anxiety Scale.</p> <p><b>Sample size:</b> 509</p> <p><b>Sample characteristics:</b> HIV+ Botswana children (age 8-16) and their parents/guardians.</p>                                                                                                                                                               | <p>The Setswana PSC has high internal consistency (Cronbach's alpha 0.87 for the parent-completed version).</p> <p>Comparing PSC scores to parental reports of concern and child-reported depression symptoms, a cut-off score of 20 on the PSC and PSC-Y maximized the sensitivity and specificity.</p>                                                                                                                                                                                                                            |
| Lawler <sup>21</sup>    | 2011                | Center for AIDS Research and Botswana-UPenn Partnership,                  | Gaborone                                                   | Neurobehavioral Effects in HIV-Positive Individuals Receiving Highly Active Antiretroviral Therapy (HAART) in Gaborone, Botswana | <p><b>Design:</b> A cross sectional study</p> <p><b>Measure:</b></p> <p>Comprehensive neuropsychological test battery Primary Care Evaluation of Mental Disorders (Prime-MD) module for depression, anxiety and alcohol</p> <p>Activities of daily living scale</p> <p><b>Sample size:</b> 60 + 80</p> <p><b>Sample characteristics:</b> HIV-positive individuals, all receiving highly active antiretroviral therapy (HAART), and demographically matched HIV-seronegative</p> | <p>HIV+ subjects were impaired for all cognitive-motor ability areas compared with matched, uninfected control subjects.</p> <p>Thirty seven percent of HIV+ patients met criteria for cognitive impairment.</p> <p>There was no difference between the two groups with respect to alcohol use</p> <p>Forty-two percent of HIV+ subjects met criteria for Generalized Anxiety Disorder (GAD), which was higher than the 25% in controls</p> <p>incidence of Major Depressive Disorder (MDD) was similar for the two groups), as</p> |

| Authors              | Date of publication | Author affiliations (first author)     | Location                   | Title                                                                                  | Method Characteristics                                                                                                                                                                                                                                                                                                                                             | Key Findings                                                                                                                                                                                                                                                                                                           |
|----------------------|---------------------|----------------------------------------|----------------------------|----------------------------------------------------------------------------------------|--------------------------------------------------------------------------------------------------------------------------------------------------------------------------------------------------------------------------------------------------------------------------------------------------------------------------------------------------------------------|------------------------------------------------------------------------------------------------------------------------------------------------------------------------------------------------------------------------------------------------------------------------------------------------------------------------|
|                      |                     |                                        |                            |                                                                                        | control subjects.                                                                                                                                                                                                                                                                                                                                                  | was level of suicidal ideation                                                                                                                                                                                                                                                                                         |
| Lewis <sup>22</sup>  | 2012                | University of Pennsylvania (Upenn) USA | Gaborone, Botswana         | Depression in HIV-Positive Women in Gaborone, Botswana.                                | <p><b>Design:</b> cross-sectional study</p> <p>random selection</p> <p><b>Measure:</b> two screening measures of depression, an inventory of activities of daily living (ADL), and subjective questionnaire of cognitive functioning.</p> <p><b>Sample size:</b>62</p> <p><b>Sample characteristics:</b> Randomly selected HIV positive women</p>                  | <p>48% of the women had depression using BDI-FS.</p> <p>The two screening measures are useful for detecting depression in women infected with HIV in resource-limited countries.</p>                                                                                                                                   |
| Zetola <sup>23</sup> | 2012                | Upenn, USA                             | MDR-TB Clinics in Botswana | Alcohol use and abuse among patients with multidrug-resistant tuberculosis in Botswana | <p><b>Design:</b> Case control study</p> <p><b>Measure:</b> author designed AUDIT</p> <p><b>Sample size:</b> MDR TB 114 , TB 114, HIV 114, Gen population 228</p> <p><b>Sample characteristics:</b></p> <p>MDR-TB patients <b>Versus:</b></p> <p>Non-MDR-TB patients control groups; HIV infected patients without a history of TB; and the general population</p> | <p>Patients with MDR-TB had a lifetime prevalence of alcohol use of 35.1%, which was lower than that of all control groups.</p> <p>Among patients with TB, alcohol abuse was found to be a risk factor for the development of MDR-TB.</p> <p>Alcohol use could be an important modifiable factor in TB management.</p> |



| Authors                 | Date of publication | Author affiliations (first author)                        | Location                                      | Title                                                                                                               | Method Characteristics                                                                                                                                                                                                                                                                                                     | Key Findings                                                                                                                                                                                                                                                                                                                                                                                                                                                                                                                                                                                 |
|-------------------------|---------------------|-----------------------------------------------------------|-----------------------------------------------|---------------------------------------------------------------------------------------------------------------------|----------------------------------------------------------------------------------------------------------------------------------------------------------------------------------------------------------------------------------------------------------------------------------------------------------------------------|----------------------------------------------------------------------------------------------------------------------------------------------------------------------------------------------------------------------------------------------------------------------------------------------------------------------------------------------------------------------------------------------------------------------------------------------------------------------------------------------------------------------------------------------------------------------------------------------|
| Gbadamosi <sup>24</sup> | 2012                | Worcester Business School<br><br>University of Worcester. | Gaborone                                      | Perceived Stress and Performance Appraisal Discomfort: The Moderating Effects of Core Self-Evaluations and Gender   | <p><b>Design:</b> A cross sectional survey</p> <p><b>Measure:</b> Perceived stress scale, core self-evaluation scale, Performance Appraisal of Discomfort scale</p> <p><b>Sample size:</b> 300</p> <p><b>Sample characteristics:</b> managers in Gaborone, Botswana.</p> <p>Usable data was obtained from 167 managers</p> | <p>A negative and insignificant association was found between performance appraisal discomfort and perceived stress.</p> <p>Neither core self-evaluations nor gender significantly moderated the relationship between performance appraisal discomfort and perceived stress.</p> <p>Women earned less income and their perceived stress was significantly higher than men's.</p> <p>Also, gender, core self-evaluations and then performance appraisal discomfort (in that order of strength) were significant predictors of perceived stress accounting for 12 percent of its variance.</p> |
| Decker <sup>25</sup>    | 2013                | University of Massachusetts ,                             | Unspecified rural and urban areas in Botswana | Stress as adaptation? A test of the adaptive boost hypothesis among Batswana men                                    | <p><b>Design:</b> ethnographic</p> <p><b>Measure:</b> salivary cortisol and Beck Depression Inventory (BDI).</p> <p><b>Sample size:</b> 32</p> <p><b>Sample characteristics:</b> urban living adult men who were actively engaged in the cash-economy.</p>                                                                 | Elevated cortisol provides an "adaptive boost" to meet daily demands and may be beneficial in some circumstances                                                                                                                                                                                                                                                                                                                                                                                                                                                                             |
| Philips <sup>26</sup>   | 2013                | Yale University School of Nursing, Connecticut. USA       | Holy cross and Pabalelong hospice(s)          | The Emotional and Spiritual Well-Being of Hospice Patients in Botswana and Sources of Distress for Their Caregivers | <p><b>Design:</b> Cross-sectional (mixed methods design)</p> <p><b>Measure:</b> Semi-structured interviews and the Quality of Death and Dying (QODD) questionnaire were used</p>                                                                                                                                           | <p>Quality of life of decedents was poor.</p> <p>Emotional and spiritual distress persist at high rates even for those receiving support from a nongovernmental hospice (NGH).</p> <p>Caregiver distress arises from practical needs, including lack of food, clothing, and</p>                                                                                                                                                                                                                                                                                                              |

| Authors                 | Date of publication | Author affiliations (first author)                       | Location                                                              | Title                                                                                                            | Method Characteristics                                                                                                                                                                                                                                                                                             | Key Findings                                                                                                                                                                                                                                                                                                                                                 |
|-------------------------|---------------------|----------------------------------------------------------|-----------------------------------------------------------------------|------------------------------------------------------------------------------------------------------------------|--------------------------------------------------------------------------------------------------------------------------------------------------------------------------------------------------------------------------------------------------------------------------------------------------------------------|--------------------------------------------------------------------------------------------------------------------------------------------------------------------------------------------------------------------------------------------------------------------------------------------------------------------------------------------------------------|
|                         |                     |                                                          |                                                                       |                                                                                                                  | <p><b>Sample size:</b> 28</p> <p><b>Characteristics:</b> primary caregivers who cared for an adult who passed away fewer than 14 months prior to the interview date and in the care of a nongovernmental hospice</p>                                                                                               | shelter, the need for assistance physically caring for their loved one, and from emotional and spiritual concerns                                                                                                                                                                                                                                            |
| Dithole <sup>27</sup>   | 2013                | Department of Health science, University of South Africa | PMH<br><br>Botswana                                                   | Posttraumatic Stress Disorder among Spouses of Patients discharged from the Intensive Care Unit after Six Months | <p><b>Design:</b> cross-sectional</p> <p><b>Measure:</b> PCL-S (PTSD Checklist).</p> <p><b>sample size:</b> 28</p> <p><b>Sample characteristics:</b> spouses of patients who had been hospitalized at the Princess Marina Hospital ICU, Gaborone, Botswana, in the six months prior to the interview sessions.</p> | <p>Ten spouses reported feeling anxious for a short while after their spouse's discharge but that they had come to terms with the experience.</p> <p>Pre- and post-counselling for close relatives, especially spouses, should be implemented at the point of hospitalization, during admission, and after discharge for a period of at least six months</p> |
| Lowenthal <sup>28</sup> | 2013                | University of Pennsylvania                               | 692 HIV-infected treated children (ages of 8- <17 years) in Botswana, | Rapid psychosocial function screening test identified treatment failure in HIV+ African youth                    | <p><b>Design:</b> cross-sectional</p> <p><b>Measure:</b> Pediatric Screening Checklist (PSC)</p> <p><b>Sample size:</b> 692</p> <p><b>Sample characteristics:</b> HIV-infected treated children (ages of 8 to &lt; 17 years)</p>                                                                                   | <p>A high score on the PSC was associated with having virologic failure (OR 1.7, 95% CI 1.1–2.6).</p> <p>The PSC may be a useful screening tool in pediatric HIV.</p>                                                                                                                                                                                        |
| Balogun <sup>29</sup>   | 2014                | University of Tokyo, Japan                               | Multinational.                                                        | Alcohol Consumption and Psychological Distress in Adolescents:<br><br>A Multi-Country Study                      | <p><b>Design:</b> cross-sectional</p> <p><b>Measure:</b> Questionnaire based survey of secondary school students</p> <p><b>Sample size:</b> 2178</p> <p><b>Sample characteristics:</b> Age of 13-15 years. Gender, not specified.</p>                                                                              | <p>Current alcohol use was 19.6%, lifetime drunkenness was 20.4.</p> <p>Current alcohol use was associated with depression and sleeplessness.</p> <p>Lifetime drunkenness was also associated with depression and sleeplessness.</p>                                                                                                                         |

| Authors                    | Date of publication | Author affiliations (first author) | Location              | Title                                                                                                          | Method Characteristics                                                                                                                                                                                                                                                        | Key Findings                                                                                                                                                                                                                                                                                                                                                                                                                                                                                             |
|----------------------------|---------------------|------------------------------------|-----------------------|----------------------------------------------------------------------------------------------------------------|-------------------------------------------------------------------------------------------------------------------------------------------------------------------------------------------------------------------------------------------------------------------------------|----------------------------------------------------------------------------------------------------------------------------------------------------------------------------------------------------------------------------------------------------------------------------------------------------------------------------------------------------------------------------------------------------------------------------------------------------------------------------------------------------------|
| Pumar <sup>30</sup>        | 2014                | UB                                 | Gaborone, Botswana    | Developing a Medical School (MS) Psychiatry Training Program in Botswana: Overcoming Obstacles with Innovation | Report                                                                                                                                                                                                                                                                        | By leveraging the experience of partner-institutions from the developed nations, UBMS has made substantial early progress in preparing a new generation of doctors to provide mental health care in Botswana                                                                                                                                                                                                                                                                                             |
| Modie-Moroka <sup>31</sup> | 2014                | UB<br>Social work department       | Francistown, Botswana | Stress, social relationships and health outcomes in low-income Francistown, Botswana                           | <b>Design:</b> cross-sectional<br><b>Measure:</b> quantitative design: WHOQOL,<br><b>Sample size:</b> 388<br><b>Sample characteristics:</b> low-income urban dwellers in Francistown, Botswana.                                                                               | the availability of social relationships was associated with better physical and psychological health and level of independence                                                                                                                                                                                                                                                                                                                                                                          |
| Plattner <sup>32</sup>     | 2014                | UB<br>Department of psychology     | UB, Botswana          | Students' Views on the Value of Psychological Research: A Contribution to Indigenizing Psychology in Botswana  | <b>Design:</b> Cross-sectional<br><b>Measure:</b> Qualitative focus group discussion<br><b>Sample size:</b> 45<br><b>Characteristics:</b> undergraduate students belonging to the first cohort of psychology students at the University of Botswana participated in the study | Students were of the view that psychological research should (a) increase knowledge to better understand human beings and the world (epistemological value); (b) create awareness about psychology within society so as to assist society in combating societal problems (societal value); (c) enhance individuals' understanding of psychology so as to accept psychology (individual value); and (d) up-date psychological theories to ensure their applicability in present times (theoretical value) |
| Korb <sup>33</sup>         | 2014                | UB<br>Department of psychology     | UB, Botswana          | Suicide ideation and depression in university students in Botswana.                                            | <b>Design:</b> Cross sectional survey<br><b>Measure:</b> BDI-II<br><b>Sample size:</b> 122<br><b>Characteristics:</b> undergraduate students                                                                                                                                  | 47.5% of the respondents reported suicide ideation, 28.7% reported previous suicide attempts, and the mean depression score was 19.14.<br><br>Suicide ideation correlated strongly with total depression scores.                                                                                                                                                                                                                                                                                         |

| Authors                | Date of publication | Author affiliations (first author)               | Location             | Title                                                                                                                | Method Characteristics                                                                                                                                                                                                                                                                                       | Key Findings                                                                                                                                                                                                                                                                                                                                                                                                                                                                                                                                                                                                                                                      |
|------------------------|---------------------|--------------------------------------------------|----------------------|----------------------------------------------------------------------------------------------------------------------|--------------------------------------------------------------------------------------------------------------------------------------------------------------------------------------------------------------------------------------------------------------------------------------------------------------|-------------------------------------------------------------------------------------------------------------------------------------------------------------------------------------------------------------------------------------------------------------------------------------------------------------------------------------------------------------------------------------------------------------------------------------------------------------------------------------------------------------------------------------------------------------------------------------------------------------------------------------------------------------------|
|                        |                     |                                                  |                      |                                                                                                                      |                                                                                                                                                                                                                                                                                                              | The level of depression severity was linearly related to suicide ideation                                                                                                                                                                                                                                                                                                                                                                                                                                                                                                                                                                                         |
| Monteiro <sup>34</sup> | 2014                | Department of Psychology, University of Botswana | UB Gaborone          | Managing stress: the influence of gender, age and emotion regulation on coping among university students in Botswana | <p><b>Design:</b> correlational survey cross-sectional</p> <p><b>Measure:</b> Difficulty in Emotion Regulation Scale and the Coping Strategy Inventory</p> <p><b>Sample size:</b> 128</p> <p><b>Sample characteristics:</b> University of Botswana students with an age range of between 18 and 29 years</p> | <p>Female students used wishful thinking and problem-focused disengagement more than male students</p> <p>Older students were more likely to use problem-solving, cognitive restructuring and express emotion coping strategies.</p> <p>Problems in emotion regulation significantly predicted problem- and emotion-focused engagement, problem- and emotion-focused disengagement and coping strategies.</p> <p>Non-acceptance of emotional responses, a type of emotion suppression, was positively correlated with problem solving, cognitive restructuring, expressing emotion, social support, problem avoidance and wishful thinking coping strategies.</p> |
| Mullan <sup>35</sup>   | 2015                | Fielding Graduate University (Texas, USA)        |                      | Psychosocial issues among children and adolescents in an integrated paediatric HIV psychology service in Botswana    | <p><b>Design:</b> cross-sectional</p> <p><b>Measure:</b> author designed self-administered questionnaire.</p> <p><b>Sample size:</b> 155</p> <p><b>Sample characteristics:</b> 27 young children aged 5–9 years and 128 adolescents aged 10–19 years</p>                                                     | <p>The most frequently identified psychosocial issues were behaviour problems (70%), family issues (58%), and HIV medication adherence (57%).</p> <p>Compared to young children, adolescents were more likely to have HIV medication adherence issues.</p> <p>Missed appointments were most commonly attributed to patient forgetfulness (21%) and conflicting appointments (18%).</p>                                                                                                                                                                                                                                                                            |
| Sandfort <sup>36</sup> | 2015                | Columbia University,                             | four southern Africa | Histories of forced sex and health outcomes among Southern African                                                   | <b>Design:</b> cross-sectional                                                                                                                                                                                                                                                                               | Nearly one-third of participants had been forced to have sex at some time in their lives. Thirty-one percent of all women reported to                                                                                                                                                                                                                                                                                                                                                                                                                                                                                                                             |

| Authors                    | Date of publication | Author affiliations (first author)       | Location                                   | Title                                                                                                        | Method Characteristics                                                                                                                                                                                                                                                                                           | Key Findings                                                                                                                                                                                                                                                                                                                                               |
|----------------------------|---------------------|------------------------------------------|--------------------------------------------|--------------------------------------------------------------------------------------------------------------|------------------------------------------------------------------------------------------------------------------------------------------------------------------------------------------------------------------------------------------------------------------------------------------------------------------|------------------------------------------------------------------------------------------------------------------------------------------------------------------------------------------------------------------------------------------------------------------------------------------------------------------------------------------------------------|
|                            |                     | USA                                      | countries                                  | lesbian and bisexual women: a cross-sectional study.                                                         | <p><b>Measure:</b> author designed</p> <p><b>Sample size:</b> 591</p> <p><b>Sample characteristics:</b> secondary data from the lesbian and bisexual women in various Southern African community-based organizations.</p>                                                                                        | <p>have experienced forced sex at least once in their life: 14.9% reported forced sex by men only; 6.6% reported forced sex by women only; 9.6% had had forced sexual experiences with both men and women</p> <p>Forced sex by both men and women was associated with lower sense of belonging to the community, drug use problem and mental distress.</p> |
| Coleman <sup>37</sup>      | 2016                | University of Pennsylvania               | Gaborone                                   | <p>Predictors of Depression among Seropositive Batswana Men and Women: A Descriptive Correlational Study</p> | <p>Design: cross-sectional study</p> <p><b>Measure:</b> the CESD demographic questionnaire, Quality of Life measure</p> <p><b>Sample size:</b> 70</p> <p><b>Sample characteristics:</b> Men and Women living with HIV; median age 35 years (range 18–57).</p>                                                    | <p>Low energy and role limitations on emotional well-being were constitute for 50% the depressive symptoms.</p> <p>There is need for providing mental health services for seropositive Batswana individuals in Botswana.</p>                                                                                                                               |
| Opondo <sup>38</sup>       | 2017                | University of Botswana (UB)              | Sbrana Psychiatric Hospital, Lobatse (SPH) | HIV prevalence among hospitalized patients at the main psychiatric referral hospital in Botswana             | <p><b>Design:</b> Cross sectional. Retrospective file review</p> <p><b>Measure:</b> Data extraction from file by investigator deigned questionnaire</p> <p><b>Sample size:</b>1725</p> <p><b>Sample characteristics:</b> Psychiatric inpatients 18-49 years admitted between Jan 1 2011 and 31 December 2012</p> | <p>HIV was more prevalent in female</p> <p>HIV was more prevalent among patients with organic mental disorders and neurotic, stress related and somatoform disorders</p> <p>Largest proportion of patients with HIV had schizophrenia, schizotypal and other psychotic disorders.</p>                                                                      |
| Westmoreland <sup>39</sup> | 2017                | The Children’s Hospital of Philadelphia, | University of Botswana, Faculty of         | Registrar wellness in Botswana: measuring burnout and identifying                                            | <p><b>Design:</b> Cross sectional</p> <p><b>Measure:</b> validated Maslach Burnout</p>                                                                                                                                                                                                                           | A high degree of burnout was reported by 75% of registrars in one or more domains.                                                                                                                                                                                                                                                                         |

| Authors                | Date of publication | Author affiliations (first author) | Location         | Title                                                                                                                   | Method Characteristics                                                                                                                                                                                                                                           | Key Findings                                                                                                                                                                                                                                                                                                                                                                                                                                                         |
|------------------------|---------------------|------------------------------------|------------------|-------------------------------------------------------------------------------------------------------------------------|------------------------------------------------------------------------------------------------------------------------------------------------------------------------------------------------------------------------------------------------------------------|----------------------------------------------------------------------------------------------------------------------------------------------------------------------------------------------------------------------------------------------------------------------------------------------------------------------------------------------------------------------------------------------------------------------------------------------------------------------|
|                        |                     | PA, USA                            | Medicine         | ways to improve wellness                                                                                                | Inventory<br><br><b>Sample size:</b> 20 registrars<br><br><b>Sample characteristics:</b> registrars (specialists in training) providing direct patient care at PMH: 20 paediatric, 16 internal medicine, and 4 emergency medicine registrars.                    | High levels of burnout were reported for emotional exhaustion in 65%,<br><br>depersonalization in 45%, and personal accomplishment in 35% of registrars.<br><br>The most common frustrations included insufficient salary and limited medical resources. Suggested<br><br>Interventions included improved mentorship and wellness lectures.                                                                                                                          |
| Olashore <sup>40</sup> | 2017                | UB                                 | Lobatse Botswana | Polypharmacy among children and adolescents with psychiatric disorders in a mental referral hospital in Botswana        | <b>Design:</b> Cross-sectional record review.<br><br><b>Measure:</b> Author design sociodemographic tool, ICD-10<br><br><b>Sample size:</b> 120<br><br><b>Sample characteristic:</b> children and adolescents aged below 18 years. Both inpatient and outpatient | The prevalence of psychiatric polypharmacy was 29.2%.<br><br>Psychiatric co-morbidity and psychotropic side effects were significantly associated with polypharmacy                                                                                                                                                                                                                                                                                                  |
| Olashore <sup>41</sup> | 2017                | Department of Psychiatry UB.       | Botswana Sbrana  | Prescribing pattern of psychotropic medications in child psychiatric practice in a mental referral hospital in Botswana | <b>Design:</b> Cross-sectional record review.<br><br><b>Measure:</b> Author design sociodemographic tool, ICD-10<br><br><b>Sample size:</b> 238<br><br><b>Sample characteristic:</b> children and adolescents aged below 18 years. Both inpatient and outpatient | 70.8% of patients who had pharmacological intervention had monotherapy.<br><br>The most commonly prescribed psychotropic agents were antipsychotics (40%).<br><br>Off-label use of antipsychotics and polypharmacy were 31.2% and 29.2% respectively.<br><br>The level of conformity to standard practice in terms of psychotropic prescribing in our setting is consistent with the reports from developed countries where more specialized care ostensibly exists. |

| Authors                | Date of publication | Author affiliations (first author) | Location          | Title                                                                                                                                        | Method Characteristics                                                                                                                                                                                                                                                                      | Key Findings                                                                                                                                                                                                                                                                                                                                                                                                                     |
|------------------------|---------------------|------------------------------------|-------------------|----------------------------------------------------------------------------------------------------------------------------------------------|---------------------------------------------------------------------------------------------------------------------------------------------------------------------------------------------------------------------------------------------------------------------------------------------|----------------------------------------------------------------------------------------------------------------------------------------------------------------------------------------------------------------------------------------------------------------------------------------------------------------------------------------------------------------------------------------------------------------------------------|
| olashore <sup>42</sup> | 2017                | UB                                 | Sbrana            | Diagnostic profiles and predictors of treatment outcome among children and adolescents attending a national psychiatric hospital in Botswana | <p><b>Design:</b> cross-sectional</p> <p><b>Measure:</b> author designed</p> <p><b>Sample size:</b> 238</p> <p><b>Sample characteristics:</b></p> <p>Children and adolescents with mental health issues</p>                                                                                 | The most common diagnosis was Attention deficit hyperactivity disorder (ADHD) with a prevalence of 25.2%. ADHD (60%) and Autism (58.3%) were more diagnosed in 5-9 years, whilst psychosis (80%) and depression (88.9%) amongst 14-17 years. Perinatal complication (OR 7.326, 95% CI: 1.312-40.899) and polypharmacy (OR 4.188, 95% CI: 1.174-14.939) independently predicted poor treatment outcome, after logistic regression |
| Olashore <sup>43</sup> | 2018                | UB                                 | Gaborone Botswana | Psychoactive substance use among first-year students in a Botswana University: pattern and demographic correlates                            | <p><b>Design:</b> Cross sectional descriptive</p> <p><b>Measure:</b> WHO student drug use Questionnaire and General Health Questionnaire</p> <p><b>Sample size:</b> 401</p> <p><b>Sample characteristics:</b> First-year university students</p>                                            | <p>Alcohol was the most widely used substance.</p> <p>Current use of alcohol, amphetamine type stimulants and benzodiazepines were associated with psychological distress.</p> <p>Positive relationship of substance use with low participation in religious activities.</p>                                                                                                                                                     |
| Olashore <sup>44</sup> | 2018                | UB                                 | SPH               | Post-traumatic stress disorder among the staff of a mental health hospital: Prevalence and risk factors                                      | <p><b>Design:</b> Cross sectional.</p> <p><b>Measure:</b> Researcher designed questionnaire, PTSD Checklist-Civilian Version (PCL-C)</p> <p><b>Sample size:</b> 201 mental health workers</p> <p><b>Sample characteristics:</b> mental health workers in psychiatric hospital, majority</p> | <p>73.1 % assaulted by patients in the period of employment at hospital. 39.3 % assaulted within the past year.</p> <p><b>18.4% met the criteria for PTSD.</b></p> <p>Exposure to violence in the past 12 months associated with PTSD</p> <p>mean score for neuroticism was found to be significantly higher in those who met the</p>                                                                                            |

| Authors                | Date of publication | Author affiliations (first author) | Location           | Title                                                                                                            | Method Characteristics                                                                                                                                                                                                                       | Key Findings                                                                                                                                                                                                                                                                                                                                                                                                                                          |
|------------------------|---------------------|------------------------------------|--------------------|------------------------------------------------------------------------------------------------------------------|----------------------------------------------------------------------------------------------------------------------------------------------------------------------------------------------------------------------------------------------|-------------------------------------------------------------------------------------------------------------------------------------------------------------------------------------------------------------------------------------------------------------------------------------------------------------------------------------------------------------------------------------------------------------------------------------------------------|
|                        |                     |                                    |                    |                                                                                                                  | nurses                                                                                                                                                                                                                                       | <p>criteria for PTSD</p> <p>Those with an experience of violence in the last 12 months were three times more likely to have PTSD compared with those who did not experience any violence</p> <p>Those with a high level of neuroticism were about two times more likely to have PTSD compared with those with a low level of neuroticism</p>                                                                                                          |
| Hetolang <sup>45</sup> | 2018                | UB                                 | Gaborone, Botswana | The associations between stressful life events and depression among students in a university in Botswana         | <p><b>Design:</b> Cross sectional</p> <p><b>Measure:</b> Becks Depression inventory, Social Readjustment Scale</p> <p><b>Sample size::</b> 304 respondents</p> <p><b>Sample characteristics:</b> First to fifth year university students</p> | <p>Depression was found in 22%</p> <p>Stressful life events significantly predicted depression</p> <p>Relationship difficulties and losses markedly associated with depression</p>                                                                                                                                                                                                                                                                    |
| Barchi <sup>46</sup>   | 2018                | USA                                | Maun               | Intimate Partner Violence Against Women in Northwestern Botswana: The Maun Women's Study. Violence Against Women | <p><b>Design:</b> Cross sectional</p> <p><b>Measure:</b> PHQ-9, self-developed Questionnaire</p> <p><b>Sample size:</b>469</p> <p><b>Sample Characteristics:</b> community</p>                                                               | <p>31% of respondents had chronic disease and depression</p> <p>6% reported attempted suicide at least once in their lifetime.</p> <p>Women reported psychological (23.3%), physical (35.9%), and sexual (9.6%) violence by an intimate partner within the past 12 months. In all, 27% and 6%</p> <p>IPV was 4 times associated with suicide</p> <p>IPV was related to alcohol abuse</p> <p>Relationship between sexual assault and alcohol abuse</p> |



| Authors                | Date of publication | Author affiliations (first author) | Location                   | Title                                                                                                                  | Method Characteristics                                                                                                                                                                                                                                                           | Key Findings                                                                                                                                                                                                                                                                                                                                                                                                                                                                                                                                                                                    |
|------------------------|---------------------|------------------------------------|----------------------------|------------------------------------------------------------------------------------------------------------------------|----------------------------------------------------------------------------------------------------------------------------------------------------------------------------------------------------------------------------------------------------------------------------------|-------------------------------------------------------------------------------------------------------------------------------------------------------------------------------------------------------------------------------------------------------------------------------------------------------------------------------------------------------------------------------------------------------------------------------------------------------------------------------------------------------------------------------------------------------------------------------------------------|
| Riva <sup>47</sup>     | 2018                | USA                                | Public Secondary schools   | Prevalence and predictors of alcohol and drug use among secondary school students in Botswana: a cross-sectional study | <p><b>Design:</b> cross-sectional</p> <p><b>Measure:</b> Alcohol Use Disorder Identification Test (AUDIT), Botswana version of WHO's Global Student Health Survey (GSHS)</p> <p><b>Sample size:</b> 1936</p> <p><b>Sample characteristics:</b><br/>Secondary school students</p> | <p>42.1% reported alcohol use, and 22.4% met criteria for hazardous alcohol use.</p> <p>Illicit drug use was reported by 16.7% students, with marijuana being the most used drug.</p> <p>Risk factors more strongly associated with alcohol and drug use were reported alcohol availability, individual and social vulnerability factors, and poor peer modeling.</p>                                                                                                                                                                                                                           |
| Olashore <sup>48</sup> | 2018                | UB                                 | Sbrana Hospital<br>Lobatse | Physical violence against health staff by mentally ill patients at a psychiatric hospital in Botswana                  | <p><b>Design:</b> Cross sectional</p> <p><b>Measure:</b> self-administered questionnaire, Andrew, and Withey Job Satisfaction Questionnaire</p> <p><b>Sample size:</b> 201</p> <p><b>Sample Characteristics:</b> Mental Health Staff</p>                                         | <p>125 (69.8%) reported a lifetime experience of physical violence by patients,</p> <p>79 (44.1%) reported being attacked in the last 12 months</p> <p>Common forms of violence included being hit (41.1%), kicked (21.8%), pushed (20.2%), and shaken (12.1%).</p> <p>Healthcare workers more likely to be attacked while calming patients. Some incurred physical injury</p> <p>Nurses were significantly more exposed to physical violence in their lifetime compared to every other healthcare provider.</p> <p>Physical violence was associated with higher level job dissatisfaction.</p> |
| Phillip <sup>49</sup>  | 2019                | UB                                 | UB                         | The influence of self-reported childhood sexual abuse on psychological and behavioural risks in young adults at a      | <p><b>Design:</b> Cross sectional</p> <p><b>Measure:</b> Childhood Sexual Abuse Scale, the 21-item Beck's Depression Inventory-II, Revised Sociosexual Orientation Inventory, and AUDIT</p>                                                                                      | <p>About 25% reported childhood sexual abuse,</p> <p>18% reported harmful alcohol use (n = 66, 18.2%),</p> <p>7.82% (n = 28) reported severe depression,</p>                                                                                                                                                                                                                                                                                                                                                                                                                                    |

| Authors                | Date of publication | Author affiliations (first author) | Location | Title                                                                                                                   | Method Characteristics                                                                                                                                                                                                  | Key Findings                                                                                                                                      |
|------------------------|---------------------|------------------------------------|----------|-------------------------------------------------------------------------------------------------------------------------|-------------------------------------------------------------------------------------------------------------------------------------------------------------------------------------------------------------------------|---------------------------------------------------------------------------------------------------------------------------------------------------|
|                        |                     |                                    |          | university in Botswana                                                                                                  | <b>Sample size:</b> 362<br><b>Sample Characteristics:</b> University students                                                                                                                                           | and<br>Childhood sexual abuse significantly predicted depression                                                                                  |
| Becker <sup>50</sup>   | 2019                | Upenn, USA                         | Gaborone | “It’s When the Trees Blossom”: Explanatory Beliefs, Stigma, and Mental Illness in the Context of HIV in Botswana.       | <b>Design:</b> cross-sectional, qualitative<br><b>Measure:</b> semi-structured interviews author designed<br><b>Sample size:</b> 42<br><b>Sample characteristics:</b> HIV positive clinic attendants, general community | Patients with mental illness are stereotyped as dangerous, untrustworthy and discriminated against. They have an increased vulnerability to HIV   |
| Khumalo <sup>51</sup>  | 2019                | UB                                 | Gaborone | The relationship between locus of control and depression: A cross-sectional survey with university students in Botswana | <b>Design:</b> cross sectional<br><b>Measure:</b> Levensons locus of control scale, becks depression inventory II<br><b>Sample size:</b> 272<br><b>Sample characteristics:</b> University students                      | Locus of control is one of the variables associated with depression                                                                               |
| Mongale <sup>52</sup>  | 2019                | UB                                 |          | Childhood Family Environment and Depression in Early Adulthood in Botswana.                                             | <b>Design:</b><br><b>Measure:</b> Beck Depression Inventory I, II<br><b>Sample size:</b> 351<br><b>Sample characteristics:</b> University Students                                                                      | Childhood drug use, parental drug and alcohol use, physical assault and psychological aggression to parents predict depression in early adulthood |
| Plattner <sup>51</sup> | 2019                |                                    | Gaborone | Developing a Computerized Brief Cognitive Screening Battery for Botswana: A Feasibility Study.                          | <b>Design:</b> cross sectional<br><b>Measure:</b> tests battery (stroop, symbol digit)<br><b>Sample size:</b> 132<br><b>Sample characteristics:</b> health adults                                                       | Brief computerized approach feasible for Botswana                                                                                                 |

| Authors                 | Date of publication | Author affiliations (first author) | Location                | Title                                                                                                                                                                                        | Method Characteristics                                                                                                                                                                                                                                                                                                                                                          | Key Findings                                                                                                                                                                                                                                                                                                                                                                                                                                                                                                                              |
|-------------------------|---------------------|------------------------------------|-------------------------|----------------------------------------------------------------------------------------------------------------------------------------------------------------------------------------------|---------------------------------------------------------------------------------------------------------------------------------------------------------------------------------------------------------------------------------------------------------------------------------------------------------------------------------------------------------------------------------|-------------------------------------------------------------------------------------------------------------------------------------------------------------------------------------------------------------------------------------------------------------------------------------------------------------------------------------------------------------------------------------------------------------------------------------------------------------------------------------------------------------------------------------------|
| Tsima <sup>53</sup>     | 2020                | UB                                 | -                       | Feasibility of implementing a novel behavioural smoking cessation intervention amongst human immunodeficiency virus-infected smokers in a resource-limited setting: A single-arm pilot trial | <p><b>Design:</b> Cross sectional</p> <p><b>Measure:</b> Snaith–Hamilton Pleasure Scale<br/>Fagerström Test for Nicotine Dependence</p> <p><b>Sample size:</b>128</p> <p><b>Sample Characteristics:</b> University students</p>                                                                                                                                                 | <p>12 weeks retention rate was 53% (21/40).</p> <p>7-day point prevalence abstinence was 37.5% (15/40)</p>                                                                                                                                                                                                                                                                                                                                                                                                                                |
| Vavani <sup>54</sup>    | 2020                | UB                                 | 8 HIV treatment centers | Intervention targets for people living with HIV and depressive symptoms in Botswana                                                                                                          | <p><b>Design:</b> cross-sectional</p> <p><b>Measure:</b> medical reports and self-report, Centre for epidemiologic studies Depression Scale (CES-D) and coping skills Cognition Emotion Regulation Questionnaire (CERQ), Behavioral Emotion Regulation Questionnaire (BERQ)</p> <p><b>Sample size:</b> 291</p> <p><b>Sample characteristics:</b><br/>People Living with HIV</p> | <p>43.4% had depressive symptoms.</p> <p>Most participants indicated that they needed help with the following topics: feelings of depression, physical tension, finding new goals and coping with HIV. In addition, they indicated preferring a self-help program in booklet format. Multiple regression analyses showed that the following coping strategies had significant relationships with depressive symptoms: rumination, catastrophizing, withdrawal, positive refocusing and refocus on planning (the latter two negatively</p> |
| Molebatsi <sup>55</sup> | 2020                | UB                                 | Gaborone                | The validity and reliability of the Patient Health Questionnaire-9 for screening depression in primary health care patients in Botswana.                                                     | <p><b>Design:</b> cross sectional</p> <p><b>Measure:</b> MINI, phq-9, WHO Quality of life scale</p> <p><b>Sample size:</b> 257</p> <p><b>Sample characteristics:</b> adult primary care clinic attendants</p>                                                                                                                                                                   | <p>PHQ -9 is a reliable instrument for screening for depression in Botswana</p>                                                                                                                                                                                                                                                                                                                                                                                                                                                           |

| Authors                 | Date of publication | Author affiliations (first author) | Location                 | Title                                                                                                                   | Method Characteristics                                                                                                                                                                | Key Findings                                                                                                                                                                                       |
|-------------------------|---------------------|------------------------------------|--------------------------|-------------------------------------------------------------------------------------------------------------------------|---------------------------------------------------------------------------------------------------------------------------------------------------------------------------------------|----------------------------------------------------------------------------------------------------------------------------------------------------------------------------------------------------|
| Olashore <sup>56</sup>  | 2020                | UB                                 | Gaborone                 | Cannabis Use Disorder Among First-Year Undergraduate Students in Gaborone, Botswana                                     | <b>Design:</b> cross sectional<br><b>Measure:</b> WHO Drug Questionnaire, DSM 5<br><b>Sample size:</b> 410<br><b>Sample characteristics:</b> University students                      | Cannabis Use Disorder found among students. Regular religious activity and receiving more than 150 USD monthly upkeep and difficulties in academic studies associated positively with cannabis use |
| Ramotwana <sup>57</sup> | 2020                | UB                                 | Gaborone                 | Family Type Predicts Mental Health Problems in Young Adults: A Survey of Students at a University in Botswana           | <b>Design:</b> cross sectional<br><b>Measure:</b> revised symptoms checklist<br><b>Sample size:</b> 264<br><b>Sample characteristics:</b> university students                         | Family types (single parent families, multiple family) predict mental health problems in young adults                                                                                              |
| Tapera <sup>58</sup>    | 2020                | UB                                 | Gaborone and Francistown | The theory of planned behavior as a behavior change model for tobacco control strategies among adolescents in Botswana. | <b>Design:</b> cross sectional<br><b>Measure:</b> self-administered questionnaire<br><b>Sample Size:</b> 2554<br><b>Sample characteristics:</b> primary and secondary school students | Attitudes, subjective norms and perceived control contribute significantly to students smoking                                                                                                     |

## References

1. Ben-Tovim D, Boyce G. A comparison between patients admitted to psychiatric hospitals in Botswana and South Australia. *Acta Psychiatrica Scandinavica*. 1988;78(2):222-226.
2. Ben-Tovim DI, Cushnie JM. The prevalence of schizophrenia in a remote area of Botswana. *The British Journal of Psychiatry*. 1986;148(5):576-580.
3. John M, Dambe M, Polhemus S, John F. Children's thinking in Botswana: Piaget tasks examined. *International journal of psychology*. 1983;18(1-4):229-238.
4. Ben-Tovim DI. A psychiatric service to the remote areas of Botswana. *The British Journal of Psychiatry*. 1983;142(2):199-203.

5. Ben-Tovim DI. DSM-III in Botswana: a field trial in a developing country. *The American journal of psychiatry*. 1985.
6. Delmonico MM, David L. Compulsive sexual behavior and HIV in Africa: A first look. *Sexual Addiction & Compulsivity: The Journal of Treatment and Prevention*. 2001;8(2):169-183.
7. Phorano O, Nthomang K, Ntseane D. Alcohol abuse, gender-based violence and HIV/AIDS in Botswana: establishing the link based on empirical evidence. *SAHARA-J: Journal of Social Aspects of HIV/AIDS*. 2005;2(1):188-202.
8. Maletle L. Aggressive and antisocial behaviours among secondary school students in Botswana: The influence of family and school based factors. *School Psychology International*. 2007;28(1):90-109.
9. Decker S. Failed Urban Migration and Psychosomatic Numbing: Cortisol, Unfulfilled Lifestyle Aspirations and Depression in Botswana. *The Economics of Health and Wellness: Anthropological Perspectives*: Emerald Group Publishing Limited; 2007:75-102.
10. Thupayagale-Tshweneagae G. Psychosocial effects experienced by grandmothers as primary caregivers in rural Botswana. *Journal of Psychiatric and Mental Health Nursing*. 2008;15(5):351-356.
11. Segopolo MT, Selemogwe MM, Plattner IE, Ketlogetswe N, Feinstein A. A screening instrument for psychological distress in Botswana: validation of the Setswana version of the 28-item General Health Questionnaire. *International Journal of Social Psychiatry*. 2009;55(2):149-156.
12. Seloilwe ES, Thupayagale-Tshweneagae G. Sexual abuse and violence among adolescent girls in Botswana: A mental health perspective. *Issues in mental health nursing*. 2009;30(7):456-459.
13. Page RM, Hall CP. Psychosocial Distress and Alcohol Use as Factors in Adolescent Sexual Behavior Among Sub-Saharan African Adolescents. *Journal of School Health*. 2009;79(8):369-379.
14. Dunn M, Selemogwe M. Play Therapy as an Intervention Against Sexual Violence in Botswana. *Journal of Psychology in Africa*. 2009;19(1):127-129.
15. Gupta R, Dandu M, Packer L, et al. Depression and HIV in Botswana: a population-based study on gender-specific socioeconomic and behavioral correlates. *PloS one*. 2010;5(12):e14252.
16. Lawler K, Mosepele M, Ratcliffe S, et al. Neurocognitive impairment among HIV-positive individuals in Botswana: a pilot study. *Journal of the international AIDS society*. 2010;13(1):15.
17. Thupayagale-Tshweneagae G, Seloilwe ES. Emotional violence among women in intimate relationships in Botswana. *Issues in mental health nursing*. 2010;31(1):39-44.
18. Plattner IE, Mberengwa DS. 'We are the forgotten ones': Occupational stress among university secretaries in Botswana. *SA Journal of Human Resource Management*. 2010;8(1):8.
19. Shumba A, Abosi OC. The nature, extent and causes of abuse of children with disabilities in schools in Botswana. *International Journal of Disability, Development and Education*. 2011;58(4):373-388.
20. Lowenthal E, Lawler K, Harari N, et al. Validation of the pediatric symptom checklist in HIV-infected Botswana. *Journal of Child & Adolescent Mental Health*. 2011;23(1):17-28.
21. Lawler K, Jeremiah K, Mosepele M, et al. Neurobehavioral effects in HIV-positive individuals receiving highly active antiretroviral therapy (HAART) in Gaborone, Botswana. *PLoS One*. 2011;6(2):e17233.
22. Lewis EL, Mosepele M, Seloilwe E, Lawler K. Depression in HIV-positive women in Gaborone, Botswana. *Health care for women international*. 2012;33(4):375-386.
23. Zetola N, Modongo C, Kip E, Gross R, Bisson G, Collman R. Alcohol use and abuse among patients with multidrug-resistant tuberculosis in Botswana. *The International journal of tuberculosis and lung disease*. 2012;16(11):1529-1534.
24. Gbadamosi G, Ross C. Perceived stress and performance appraisal discomfort: The moderating effects of core self-evaluations and gender. *Public Personnel Management*. 2012;41(4):637-659.

25. Decker SA, Aggott Z. Stress as adaptation? A test of the adaptive boost hypothesis among Batswana men. *Evolution and Human Behavior*. 2013;34(1):55-60.
26. Philips PL, Lazenby M. The emotional and spiritual well-being of hospice patients in Botswana and sources of distress for their caregivers. *Journal of Palliative Medicine*. 2013;16(11):1438-1445.
27. Dithole K, Thupayagale-Tshweneagae G, Mgutshini T. Posttraumatic stress disorder among spouses of patients discharged from the intensive care unit after six months. *Issues in mental health nursing*. 2013;34(1):30-35.
28. Lowenthal E, Lawler K, Harari N, et al. Rapid psychosocial function screening test identified treatment failure in HIV+ African youth. *AIDS care*. 2012;24(6):722-727.
29. Balogun O, Koyanagi A, Stickleby A, Gilmour S, Shibuya K. Alcohol consumption and psychological distress in adolescents: a multi-country study. *Journal of adolescent health*. 2014;54(2):228-234.
30. Pumar M, Opondo P, Ayugi J, Reid M. Developing a medical school psychiatry training program in Botswana: overcoming obstacles with innovation. *Academic medicine: journal of the Association of American Medical Colleges*. 2014;89(8 Suppl):S111-112.
31. Modie-Moroka T. Stress, social relationships and health outcomes in low-income Francistown, Botswana. *Social psychiatry and psychiatric epidemiology*. 2014;49(8):1269-1277.
32. Plattner IE, Moagi-Gulubane S. Students' Views on the Value of Psychological Research: A Contribution to Indigenising Psychology in Botswana. *Journal of Psychology in Africa*. 2009;19(3):341-346.
33. Korb I, Plattner IE. Suicide ideation and depression in university students in Botswana. *Journal of Psychology in Africa*. 2014;24(5):420-426.
34. Monteiro NM, Balogun SK, Oratile KN. Managing stress: the influence of gender, age and emotion regulation on coping among university students in Botswana. *International journal of adolescence and youth*. 2014;19(2):153-173.
35. Mullan LE, Mullan PC, Anabwani GM. Psychosocial issues among children and adolescents in an integrated paediatric HIV psychology service in Botswana. *Journal of Psychology in Africa*. 2015;25(2):160-163.
36. Sandfort T, Frazer MS, Matebeni Z, et al. Histories of forced sex and health outcomes among Southern African lesbian and bisexual women: a cross-sectional study. *BMC women's health*. 2015;15(1):22.
37. Coleman CL. Predictors of Depression among Seropositive Batswana Men and Women: A Descriptive Correlational Study. *Archives of psychiatric nursing*. 2016;30(6):736-739.
38. Opondo PR, Ho-Foster AR, Ayugi J, et al. HIV prevalence among hospitalized patients at the main psychiatric referral hospital in Botswana. *AIDS and Behavior*. 2018;22(5):1503-1516.
39. Westmoreland K, Lowenthal E, Finalle R, et al. Registrar wellness in Botswana: Measuring burnout and identifying ways to improve wellness. *African Journal of Health Professions Education*. 2017;9(3):98-102.
40. Olashore AA, Rukewe A. Polypharmacy among children and adolescents with psychiatric disorders in a mental referral hospital in Botswana. *BMC psychiatry*. 2017;17(1):174.
41. Olashore A, Ayugi J, Opondo P. Prescribing pattern of psychotropic medications in child psychiatric practice in a mental referral hospital in Botswana. *The Pan African Medical Journal*. 2017;26.
42. Olashore AA, Frank-Hatitchki B, Ogunwobi O. Diagnostic profiles and predictors of treatment outcome among children and adolescents attending a national psychiatric hospital in Botswana. *Child and Adolescent Psychiatry and Mental Health*. 2017;11(1):8.
43. Olashore AA, Ogunwobi O, Totego E, Opondo PR. Psychoactive substance use among first-year students in a Botswana University: pattern and demographic correlates. *BMC psychiatry*. 2018;18(1):270.

44. Olashore AA, Akanni OO, Molebatsi K, Ogunjumo JA. Post-traumatic stress disorder among the staff of a mental health hospital: Prevalence and risk factors. *South African journal of psychiatry*. 2018;24(1).
45. Hetolang LT, Amone-P'Olak K. The associations between stressful life events and depression among students in a university in Botswana. *South African journal of psychology*. 2018;48(2):255-267.
46. Barchi F, Winter S, Dougherty D, Ramaphane P. Intimate partner violence against women in northwestern Botswana: The Maun women's study. *Violence against women*. 2018;24(16):1909-1927.
47. Riva K, Allen-Taylor L, Schupmann WD, Mphele S, Moshashane N, Lowenthal ED. Prevalence and predictors of alcohol and drug use among secondary school students in Botswana: a cross-sectional study. *BMC public health*. 2018;18(1):1396.
48. Olashore AA, Akanni OO, Ogundipe RM. Physical violence against health staff by mentally ill patients at a psychiatric hospital in Botswana. *BMC health services research*. 2018;18(1):362.
49. Phillip O, Amone-P'Olak K. The influence of self-reported childhood sexual abuse on psychological and behavioural risks in young adults at a university in Botswana. *South African journal of psychology*. 2019;49(3):353-363.
50. Becker TD, Ho-Foster AR, Poku OB, et al. "It's When the Trees Blossom": Explanatory Beliefs, Stigma, and Mental Illness in the Context of HIV in Botswana. *Qualitative health research*. 2019;29(11):1566-1580.
51. Khumalo T, Plattner IE. The relationship between locus of control and depression: A cross-sectional survey with university students in Botswana. *South African Journal of Psychiatry*. 2019;25(1).
52. Mongale N, Amone-P'Olak K. Childhood family environment and depression in early adulthood in Botswana. *Southern African Journal of Social Work and Social Development*. 2019;31(3):1-18.
53. Tsimba BM, Moedi P, Maunge J, et al. Feasibility of implementing a novel behavioural smoking cessation intervention amongst human immunodeficiency virus-infected smokers in a resource-limited setting: A single-arm pilot trial. *Southern African Journal of HIV Medicine*. 2020;21(1):1-6.
54. Vavani B, Kraaij V, Spinhoven P, Amone-P'Olak K, Garnefski N. Intervention targets for people living with HIV and depressive symptoms in Botswana. *African Journal of AIDS Research*. 2020;19(1):80-88.
55. Molebatsi K, Motlathledi K, Wambua GN. The validity and reliability of the Patient Health Questionnaire-9 for screening depression in primary health care patients in Botswana. *BMC Psychiatry*. 2020;20(1):1-10.
56. Olashore AA, Opondo PR, Ogunjumo JA, Ayugi JO. Cannabis use disorder among first-year undergraduate students in Gaborone, Botswana. *Substance abuse: research and treatment*. 2020;14:1178221820904136.
57. Ramotwana BK, Amone-P'Olak K. Family type predicts mental health problems in young adults: a survey of students at a University in Botswana. *Southern African Journal of Social Work and Social Development*. 2020;32(2):1-17.
58. Tapera R, Mbongwe B, Mhaka-Mutepfa M, Lord A, Phaladze NA, Zetola NM. The theory of planned behavior as a behavior change model for tobacco control strategies among adolescents in Botswana. *PLoS one*. 2020;15(6):e0233462.
